# Supplementary material for: Multifunctional PEG Carrier by Chemoenzymatic Synthesis for Drug Delivery Systems: In Memory of Professor Andrzej Dworak
Source: MDPI journal article supplement (doi:10.3390/polym14142900), 2022-07-16
Supplement: s1 [file s1]

# Multifunctional PEG Carrier by Chemoenzymatic Synthesis for Drug Delivery Systems: In Memory of Professor Andrzej Dworak

Judit E. Puskas <sup>1,\*</sup>, Gayatri Shrikhande <sup>2</sup>, Eniko Krisch <sup>1</sup> and Kristof Molnar <sup>1</sup>

<sup>1</sup> Department of Food, Agricultural and Biological Engineering, College of Food, Agricultural, and Environmental Sciences, The Ohio State University, 222 FABE, 1680 Madison Avenue, Wooster, OH 44691, USA;  
molnarnekrisch.1@osu.edu (E.K.); molnar.182@osu.edu (K.M.)

<sup>2</sup> Dantari, Inc., 1290 Rancho Conejo Blvd, Suite 103, Thousand Oaks, CA 91320, USA; gayatri.shrikhande20@gmail.com

\* Correspondence: puskas.19@osu.edu

## Supporting Information

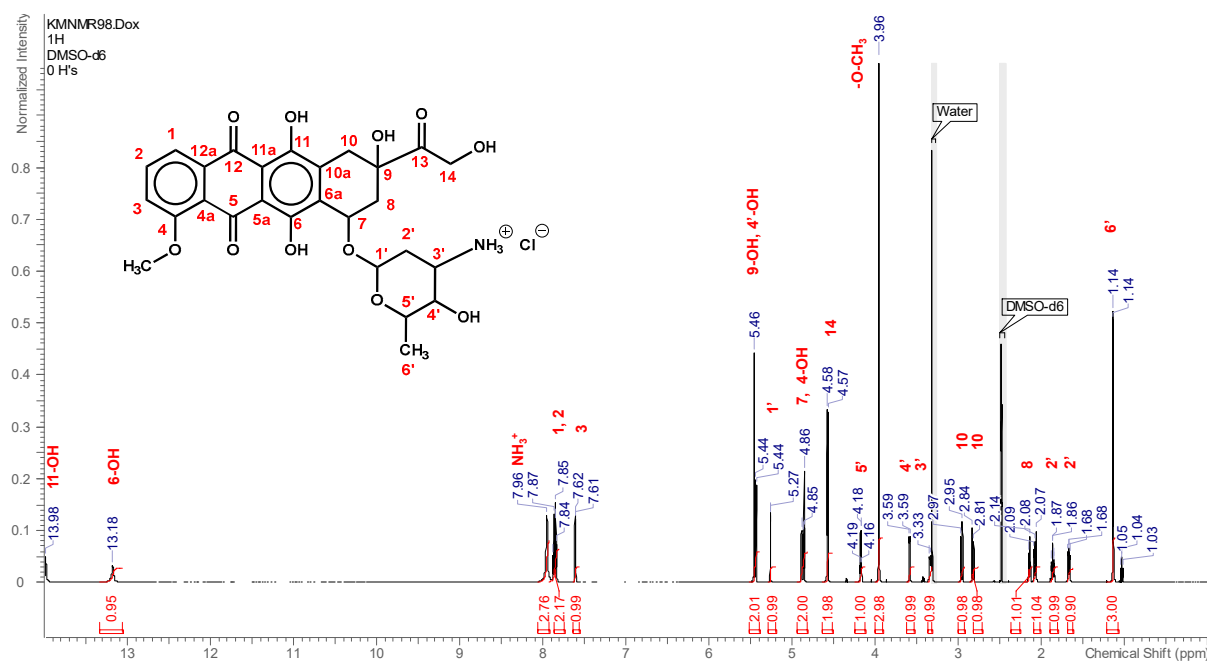

Figure S1. <sup>1</sup>H NMR spectrum of DOX.HCl.

KMNMR106 2FA-2Dox-dPEG C13  
13C  
DMSO-d6  
0 C's

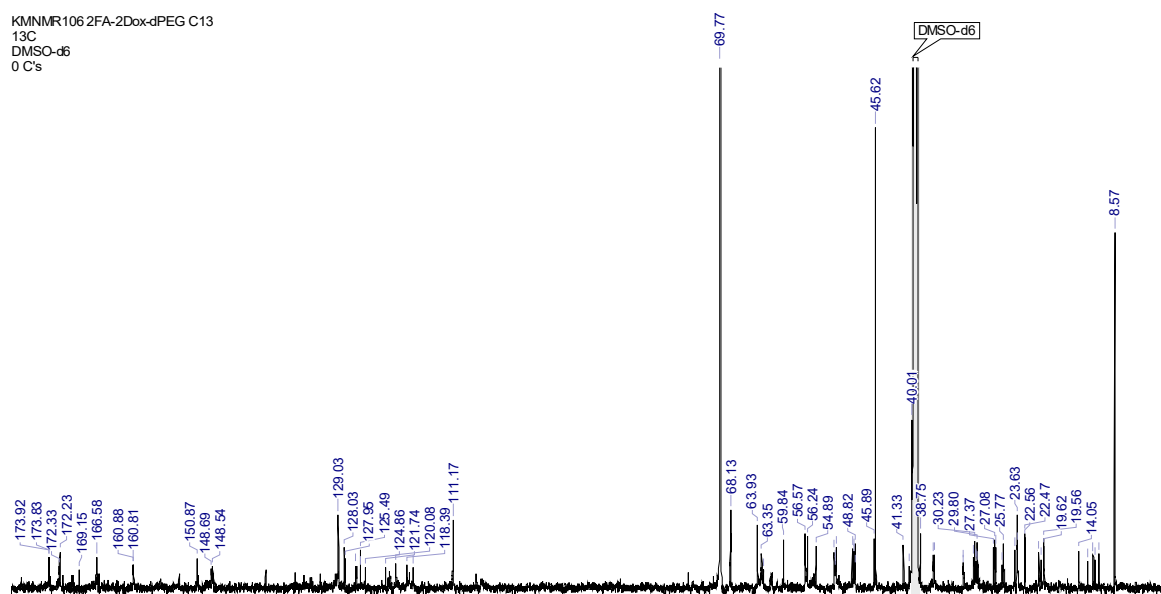

**Figure S2.**  $^{13}\text{C}$  NMR spectrum of FA<sub>2</sub>-dPEG-DOX<sub>2</sub>.
